# Supplementary material for: Diabetic microvascular complications are associated with reduced global longitudinal strain independent of atherosclerotic coronary artery disease in asymptomatic patients with diabetes mellitus: a cross-sectional study
Source: Springer Nature journal article supplement (doi:10.1186/s12872-021-02063-w), 2021-06-02
Supplement: MOESM1 [file 19222290]

## Additional file 1

Multivariable linear regression model of global longitudinal strain in patients with and without significant coronary artery disease \*

|                             | Multivariable ** |        |       | P       |
|-----------------------------|------------------|--------|-------|---------|
|                             | $\beta$          | 95% CI |       |         |
| <b>Clinical</b>             |                  |        |       |         |
| Age (years)                 |                  |        |       |         |
| Men                         |                  |        |       |         |
| BMI (kg/m <sup>2</sup> )    | 0.13             | 0.06   | 0.19  | < 0.001 |
| MAP (mmHg)                  | 0.04             | 0.01   | 0.07  | 0.01    |
| Diabetes duration (years)   |                  |        |       |         |
| Microvascular complications | 0.50             | 0.14   | 0.86  | 0.01    |
| <b>Biochemistry</b>         |                  |        |       |         |
| HbA1c (mmol/mol)            |                  |        |       |         |
| <b>Medication</b>           |                  |        |       |         |
| Acetylsalicylic acid        |                  |        |       |         |
| Calcium blockers            |                  |        |       |         |
| <b>Type of diabetes</b>     |                  |        |       |         |
| T2DM                        | 0.69             | -0.11  | 1.49  | ns      |
| <b>Echocardiography</b>     |                  |        |       |         |
| e' (cm/sec)                 | -12.42           | -22.34 | -2.49 | 0.01    |
| <b>Computed tomography</b>  |                  |        |       |         |
| PB (%)                      |                  |        |       |         |

$\beta$ , beta coefficient; 95% CI, 95% confidence interval; ns, not significant; BMI, body mass index; MAP, mean arterial pressure; HbA1c, glycated haemoglobin A1c; T2DM, type 2 diabetes mellitus; e', tissue Doppler mean early diastolic mitral annulus velocity; PB, plaque burden.

\* All patients had a PB < 70%

\*\* Data were available for 244 patients.
